# Supplementary material for: Ethyl Gallate Isolated from Castanopsis cuspidata var. sieboldii Branches Inhibits Melanogenesis and Promotes Autophagy in B16F10 Cells
Source: MDPI journal article supplement (doi:10.3390/antiox12020269), 2023-01-25
Supplement: s1 [file s1]

## Supplementary data

# Ethyl Gallate Isolated from *Castanopsis cuspidata* var. *Sieboldii* Branches Inhibits Melanogenesis and Promotes Autophagy in B16F10 Cells

Moon-Hee Choi <sup>1</sup>, Seung-Hwa Yang <sup>2</sup>, Da-Song Kim <sup>2</sup>, Nam-Doo Kim <sup>3</sup>, and Hyun-Jae Shin <sup>1,2,\*</sup>

## Table captions

**Table S1.** Antioxidant effect results of CCSB EtOAc fraction 1-3.

## Figure captions

**Figure S1.** (A) DPPH free radical scavenging activities and (B) ABTS cation radical scavenging activities of CCSB EtOAc fraction 1-3.

**Figure S2.** (A) <sup>1</sup>H-NMR spectrum of compound 1 in DMSO-d<sub>6</sub>. (B) <sup>13</sup>C-NMR spectrum of compound 1 in DMSO-d<sub>6</sub>, (C) LC-MS/MS profile of the ethyl gallate, (D) LC-MS/MS profile of the compound 1.

**Figure S3.** Measurement of (A) viability of B16F10 melanoma cells treated with CCSB and Measurement of melanin content with 5–20 µg/mL CCSB. Relative melanin content was determined at 72 h after treatment. n = 3, error bars, mean ± standard deviation. Effect of 100 µg/mL arbutin (367 µM) on melanin synthesis and tyrosinase activity in B16F10 cells. Significantly different compared with α-MSH, \* p < 0.05, \*\* p < 0.01. α-MSH: α-melanocyte-stimulating hormone.

**Figure S4.** (A) Effect of the CCSB and arbutin on the tyrosinase (TYR), tyrosinase related protein 1 (TRP-1), and tyrosinase related protein 2 (TRP-2) protein expression in B16F10 melanoma cells. B16F10 melanoma cells were treated with the indicated concentrations of the CCSB and arbutin prior to α-melanocyte-stimulating hormone (α-MSH) treatment for 24 h. The loading control was assessed using a β-actin antibody. (B) Quantitative analysis of the TYR, TRP-1, TRP-2 by western blotting. Cell lysates were subjected to western blotting using antibodies against TYR, TRP-1, and TRP-2. \* p < 0.05, \*\* p < 0.01, compared with α-MSH treatment.

**Figure S5.** (A) Effect of the CCSB and arbutin on the p-PKA, and p-CREB protein expression in B16F10 melanoma cells. B16F10 melanoma cells were treated with the indicated concentrations of the CCSB and arbutin prior to  $\alpha$ -melanocyte-stimulating hormone ( $\alpha$ -MSH) treatment for 24 h. The loading control was assessed using a  $\beta$ -actin antibody. (B) Quantitative analysis of the p-PKA, p-CREB by western blotting. Cell lysates were subjected to western blotting using antibodies against TYR, TRP-1, and TRP-2. \*  $p < 0.05$ , \*\*  $p < 0.01$ , compared with  $\alpha$ -MSH treatment.

## Supplementary Table

Table S1.

| Sample | DPPH IC <sub>50</sub> (μg/mL) | ABTS IC <sub>50</sub> (μg/mL) |
|--------|-------------------------------|-------------------------------|
| Fr. 1  | 111.49 ± 1.60                 | 111.74 ± 2.65                 |
| Fr. 2  | 88.50 ± 3.96                  | 65.19 ± 1.72                  |
| Fr. 3  | 127.41 ± 0.48                 | 126.79 ± 3.99                 |

## Supplementary Figures

Figure S1.

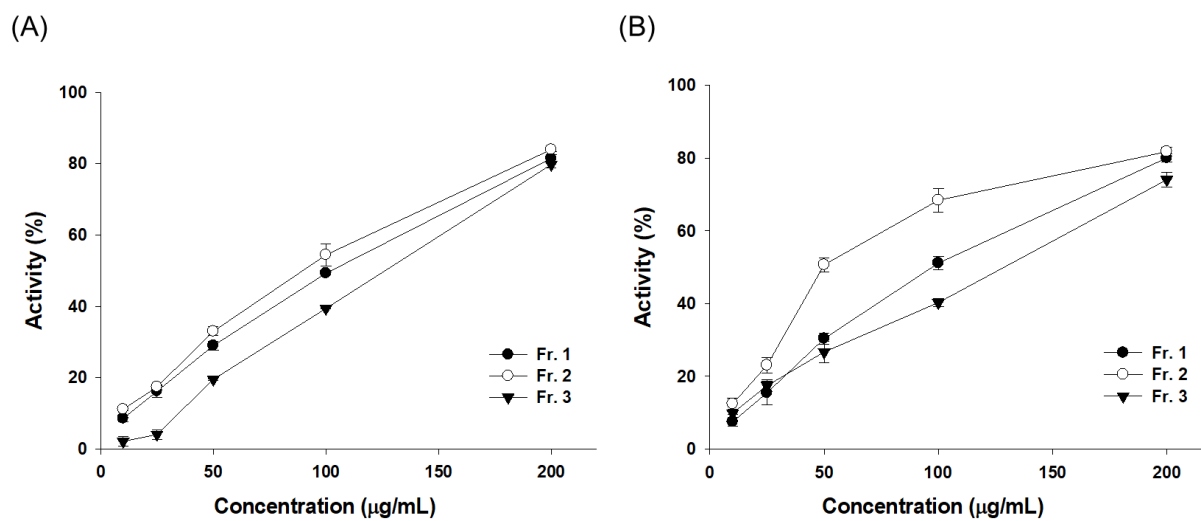

**Figure S1.** (A) DPPH free radical scavenging activities and (B) ABTS cation radical scavenging activities of CCSB EtOAc fraction 1-3.

**Figure S2.**

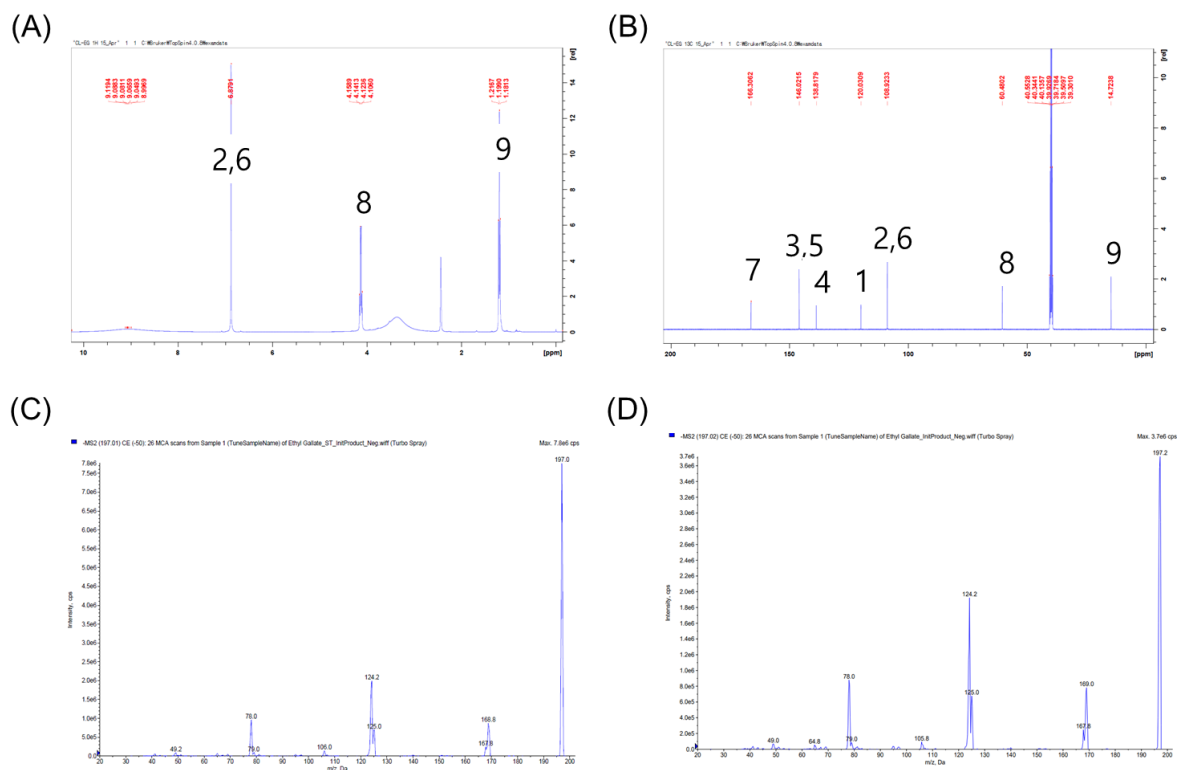

**Figure S2.** (A)  $^1\text{H}$ -NMR spectrum of compound 1 in  $\text{DMSO-d}_6$ . (B)  $^{13}\text{C}$ -NMR spectrum of compound 1 in  $\text{DMSO-d}_6$ , (C) LC-MS/MS profile of the ethyl gallate, (D) LC-MS/MS profile of the compound 1.

**Figure S3.**

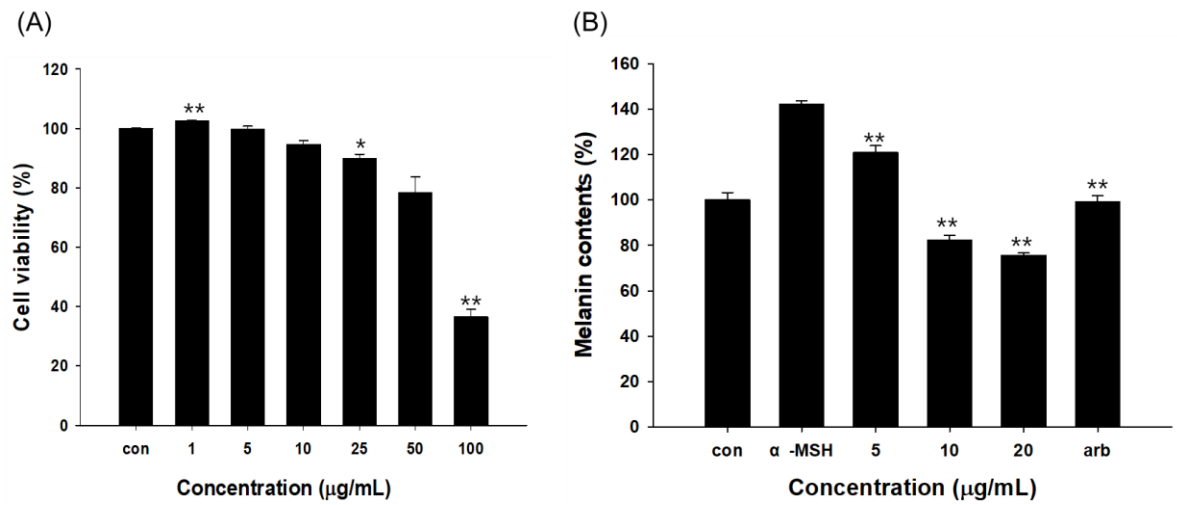

**Figure S3.** Measurement of (A) viability of B16F10 melanoma cells treated with CCSB and Measurement of (B) melanin content with 5–20 μg/mL CCSB. Relative melanin content was determined at 72 h after treatment. n = 3, error bars, mean ± standard deviation. Effect of 100 μg/mL arbutin (367 μM) on melanin synthesis and tyrosinase activity in B16F10 cells. Significantly different compared with α-MSH, \* p < 0.05, \*\* p < 0.01. α-MSH: α-melanocyte-stimulating hormone.

**Figure S4.**

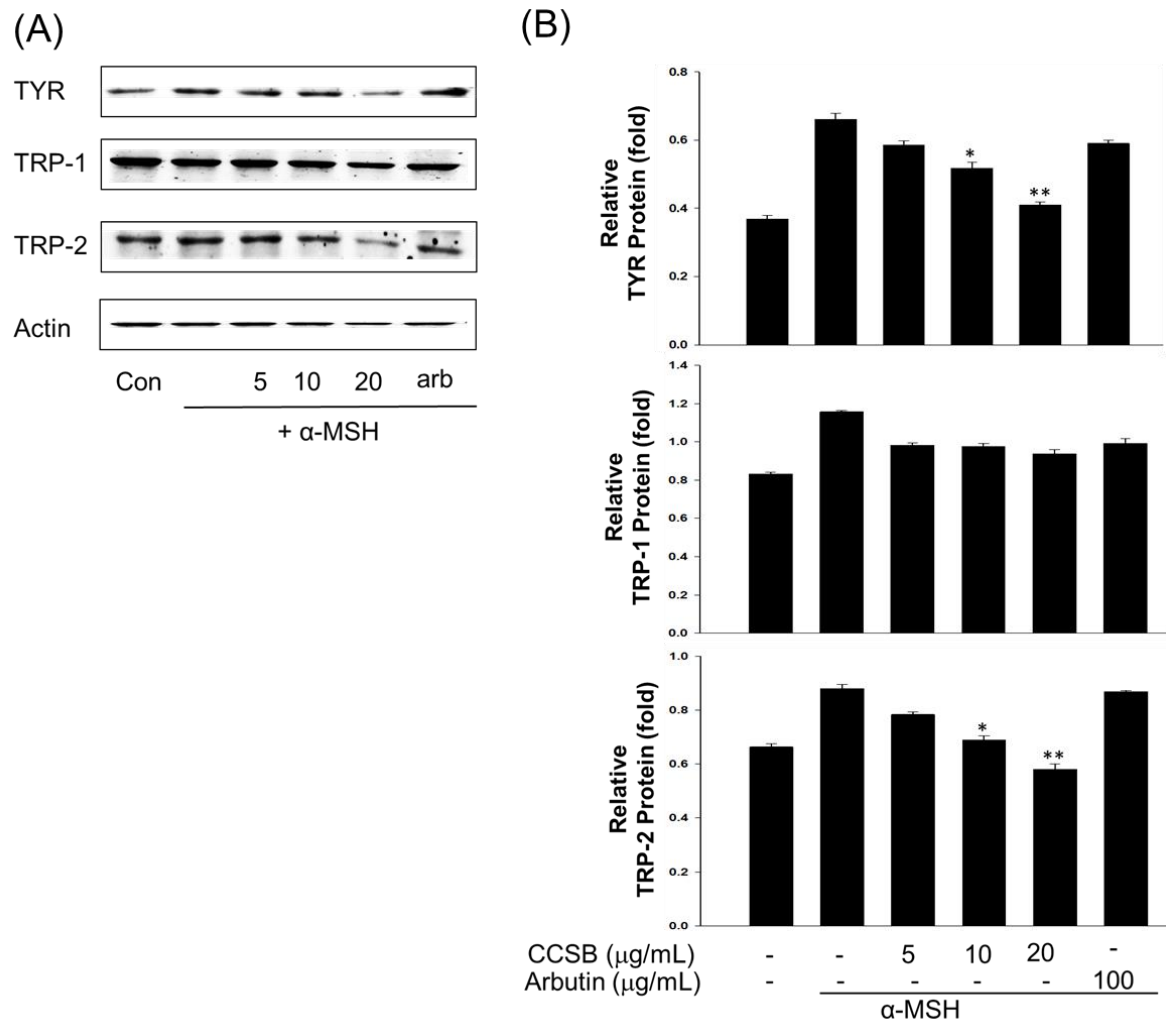

**Figure S4.** (A) Effect of the CCSB and arbutin on the tyrosinase (TYR), tyrosinase related protein 1 (TRP-1), and tyrosinase related protein 2 (TRP-2) protein expression in B16F10 melanoma cells. B16F10 melanoma cells were treated with the indicated concentrations of the CCSB and arbutin prior to  $\alpha$ -melanocyte-stimulating hormone ( $\alpha$ -MSH) treatment for 24 h. The loading control was assessed using a  $\beta$ -actin antibody. (B) Quantitative analysis of the TYR, TRP-1, TRP-2 by western blotting. Cell lysates were subjected to western blotting using antibodies against TYR, TRP-1, and TRP-2. \*  $p < 0.05$ , \*\*  $p < 0.01$ , compared with  $\alpha$ -MSH treatment.

**Figure S5.**

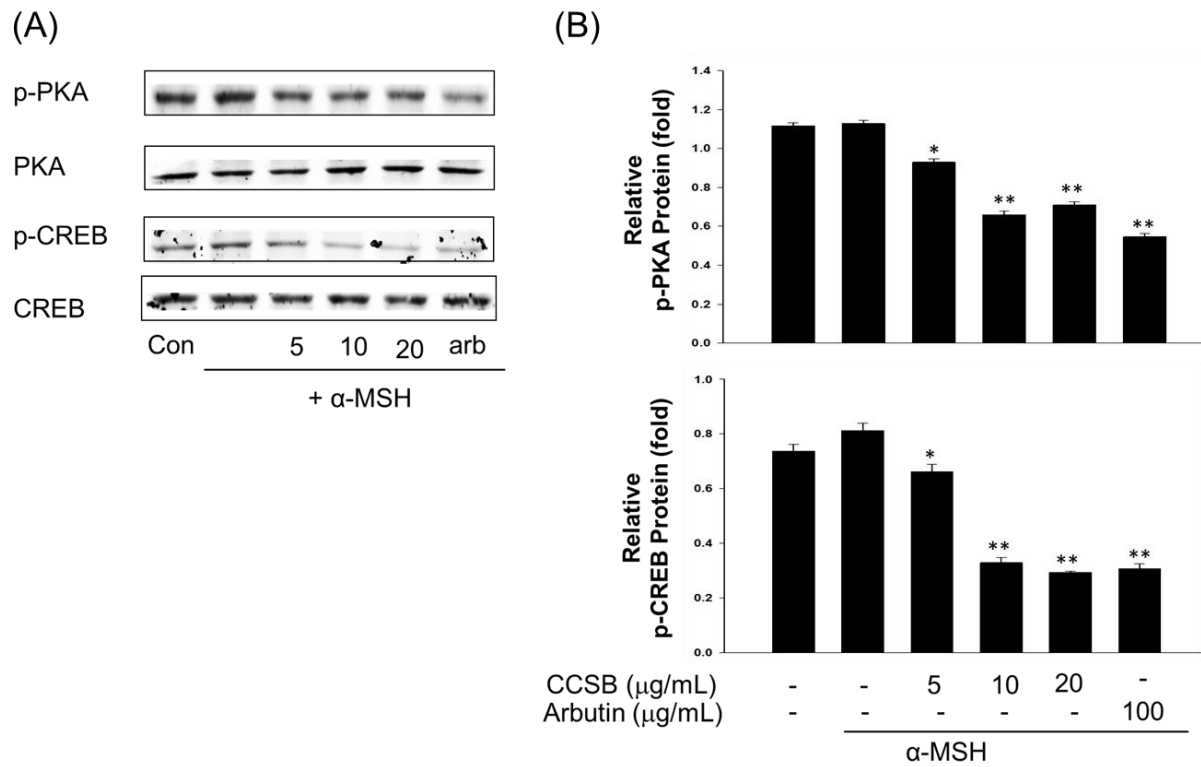

**Figure S5.** (A) Effect of the CCSB and arbutin on the p-PKA, and p-CREB protein expression in B16F10 melanoma cells. B16F10 melanoma cells were treated with the indicated concentrations of the CCSB and arbutin prior to  $\alpha$ -melanocyte-stimulating hormone ( $\alpha$ -MSH) treatment for 24 h. The loading control was assessed using a  $\beta$ -actin antibody. (B) Quantitative analysis of the p-PKA, p-CREB by western blotting. Cell lysates were subjected to western blotting using antibodies against TYR, TRP-1, and TRP-2. \*  $p < 0.05$ , \*\*  $p < 0.01$ , compared with  $\alpha$ -MSH treatment.
